1 ACBD3 is an essential pan-enterovirus host factor that mediates the interaction between viral 3A  
2 protein and cellular protein PI4KB

3

4 Heyrhyoung Lyoo<sup>1</sup>, Hilde M. van der Schaar<sup>1\*</sup>, Cristina M. Dorobantu<sup>1†</sup>, Jeroen R.P.M. Strating<sup>1</sup>,  
5 and Frank J.M. van Kuppeveld<sup>1#</sup>

6

7 <sup>1</sup>Department of Infectious Diseases & Immunology, Faculty of Veterinary Medicine, Utrecht  
8 University, Utrecht, The Netherlands

9

10 Running Head: ACBD3 mediates the 3A-PI4KB interaction

11

12 #Address correspondence to Frank J.M. van Kuppeveld, [f.j.m.vankuppeveld@uu.nl](mailto:f.j.m.vankuppeveld@uu.nl).

13 \*Present address: GenDx, Utrecht, The Netherlands

14 †Present address: INSERM U1110-Institute of Viral and Liver Disease, Strasbourg, France.

15

16 Abstract: 250 words

17 Total word counts: 4166 words

## 18 **Abstract**

19 The enterovirus genus of the picornavirus family includes a large number of important human pathogens  
20 such as poliovirus, coxsackievirus, enterovirus-A71, and rhinoviruses. Like all other positive-strand RNA  
21 viruses, genome replication of enteroviruses occurs on rearranged membranous structures called replication  
22 organelles (ROs). Phosphatidylinositol 4-kinase III $\beta$  (PI4KB) is required by all enteroviruses for RO  
23 formation. The enteroviral 3A protein recruits PI4KB to ROs, but the exact mechanism remains elusive.  
24 Here, we investigated the role of Acyl-coenzyme A binding domain containing 3 (ACBD3) in PI4KB  
25 recruitment upon enterovirus replication using ACBD3-knockout (ACBD3<sup>KO</sup>) cells. ACBD3 knockout  
26 impaired replication of representative viruses from four enterovirus and two rhinovirus species. PI4KB  
27 recruitment was not observed in the absence of ACBD3. The lack of ACBD3 also affected the localization  
28 of individually expressed 3A, causing 3A to localize to the endoplasmic reticulum instead of the Golgi.  
29 Reconstitution of wt ACBD3 restored PI4KB recruitment and 3A localization, while an ACBD3 mutant  
30 that cannot bind to PI4KB restored 3A localization, but not virus replication. Consistently, reconstitution  
31 of a PI4KB mutant that cannot bind ACBD3 failed to restore virus replication in PI4KB<sup>KO</sup> cells. Finally,  
32 by reconstituting ACBD3 mutants lacking specific domains in ACBD3<sup>KO</sup> cells, we show that Acyl-  
33 coenzyme A binding (ACB) and charged amino acids region (CAR) domains are dispensable for 3A-  
34 mediated PI4KB recruitment and efficient enterovirus replication. Altogether, our data provide new insight  
35 into the central role of ACBD3 in recruiting PI4KB by enterovirus 3A and reveal the minimal domains of  
36 ACBD3 involved in recruiting PI4KB and supporting enterovirus replication.

37

## 38 **Importance**

39 As all other RNA viruses, enteroviruses reorganize host cellular membranes for efficient genome  
40 replication. A host lipid kinase, PI4KB, plays an important role on this membrane rearrangement. The exact  
41 mechanism of how enteroviruses recruit PI4KB was unclear. Here, we revealed a role of a Golgi-residing  
42 protein, ACBD3, as a mediator of PI4KB recruitment upon enterovirus replication. ACBD3 is responsible  
43 for proper localization of enteroviral 3A proteins in host cells which is important for 3A to recruit PI4KB.  
44 By testing ACBD3 and PI4KB mutants that abrogate the ACBD3-PI4KB interaction, we showed that this  
45 interaction is crucial for enterovirus replication. The importance of specific domains of ACBD3 was  
46 evaluated for the first time, and the essential domains for enterovirus replication were identified. Our  
47 findings open up a possibility for targeting ACBD3 or its interaction with virus as a novel strategy for a  
48 broad-spectrum antiviral drug.

49

## 50 **Introduction**

51 The *Picornaviridae* family is a large group of viruses with a single-stranded, positive-sense RNA genome.  
52 Members of the *Enterovirus* genus, which includes poliovirus [PV], coxsackievirus [CV], enterovirus A71  
53 [EV-A71], EV-D68, and rhinovirus [RV], can cause diverse human diseases such as poliomyelitis,  
54 meningitis, hand-foot-and-mouth disease, respiratory illness (1). Even though enteroviruses are associated  
55 with a variety of clinical manifestations, there are currently no approved vaccines against most  
56 enteroviruses except for PV and EV-A71, and antiviral drugs are not available.

57 All positive-sense RNA viruses, including picornaviruses, induce reorganization of host cellular  
58 membranes (2-4) into so called replication organelles (ROs). ROs are enriched with viral replication factors  
59 and co-opted host factors, and serve several important purposes in virus replication (5) including facilitating  
60 genome replication. Among picornaviruses, enteroviruses and kobuviruses exploit a similar mechanism for  
61 RO formation. A host factor, phosphatidylinositol 4-kinase type III beta (PI4KB) is recruited to the  
62 replication sites by viral 3A protein (6-8). PI4KB is a cytosolic lipid kinase that must be recruited to  
63 membranes to exert its function and there it generates phosphatidylinositol 4-phosphate (PI4P)-enriched  
64 environment (7, 9). PI4P recruits and concentrates cellular proteins, and possibly also viral proteins, to  
65 facilitate viral genome replication (10, 11). Among the cellular proteins that interact with PI4P are lipid-  
66 transfer proteins, such as oxysterol binding protein (OSBP) (12). In normal condition, OSBP creates  
67 membrane contact sites between endoplasmic reticulum (ER) and PI4P-enriched trans-Golgi membranes  
68 and shuttles cholesterol in exchange for PI4P (13). In a similar manner, OSBP is recruited to RO membranes  
69 and mediates a PI4P-dependent flux of cholesterol from ER to ROs (14).

70 In uninfected cells, PI4KB is recruited to Golgi membranes among others by the small GTPase  
71 ADP-ribosylation factor 1 (Arf1) (15) or by acyl-CoA binding domain containing 3 (ACBD3) (7, 8, 16).  
72 Kobuviruses recruit PI4KB through ACBD3, which directly interacts with 3A (7, 11). Recently, the crystal  
73 structure of the kobuvirus 3A-ACBD3 complex became available, which revealed the binding sites that are

74 important for the 3A-ACBD3 interaction (6). Point mutations in 3A and ACBD3 at the binding interface  
75 inhibited the activation of PI4KB (17), suggesting that PI4KB recruitment to membranes via 3A-ACBD3-  
76 PI4KB interaction is necessary for kobuviruses to exploit PI4KB activity.

77         The 3A protein of several enteroviruses (*e.g.*, PV and coxsackievirus B3 [CVB3]) binds to brefeldin  
78 A resistance guanine nucleotide exchange factor 1 (GBF1), a guanine exchange factor that activates the  
79 small GTPase Arf1. Arf1 interacts with PI4KB in non-infected cells. However, evidence has been presented  
80 that PI4KB recruitment by CVB3 and RV 3A likely occurs independently of GBF1 and Arf1 (18, 19). A  
81 number of enterovirus 3A proteins have been shown to bind to ACBD3 (8, 18). Therefore, several studies  
82 have investigated whether enteroviruses depend on ACBD3 to recruit PI4KB. While in one study  
83 knockdown of ACBD3 in HeLa cells inhibited poliovirus (PV) replication (8), another reported no  
84 inhibition of PV replication in ACBD3-knockdown HEK-293T, IMR5, and HeLa cells (20). In our previous  
85 work, we did not observe inhibition of CVB3 or RV replication and no effects on PI4KB recruitment upon  
86 ACBD3 knockdown (18, 19).

87         Here, we re-evaluated the importance of ACBD3 for enterovirus replication using ACBD3  
88 knockout (ACBD3<sup>KO</sup>) cells. We observed that ACBD3 supports replication of representative viruses of  
89 different human enterovirus species (EV-A/B/C/D, RV-A/B) by mediating PI4KB recruitment by 3A. For  
90 the first time, we showed that the interaction between ACBD3 and PI4KB is crucial for enterovirus  
91 replication. In addition, we dissected the different domains of ACBD3 and uncovered that the glutamine-  
92 rich region (Q) and Golgi dynamics domain (GOLD) together suffice to support enterovirus replication.  
93 Furthermore, our data suggest that ACBD3 is important for proper 3A localization. Overall, our findings  
94 implicate that ACBD3 is not just an intermediate through which 3A recruits PI4KB, but may play a central  
95 role in RO formation by scaffolding viral proteins and host proteins.

96

## 97 **Results**

### 98 **ACBD3 knockout inhibits replication of enterovirus A-D and rhinovirus A-B species.**

99 Previously, we observed no effects on CVB3 and RV replication in HeLa cells, in which ACBD3 was  
100 knocked down for more than 90% (18, 19). Here, we set out to study enterovirus replication in ACBD3<sup>KO</sup>  
101 HeLa cells. HeLa cells lacking ACBD3 were generated with CRISPR-Cas9 technology, and the knockout  
102 was confirmed by Western blot analysis (Fig. S1A). Next, we evaluated enterovirus replication kinetics in  
103 ACBD3<sup>KO</sup> cells using representative viruses of four different human enterovirus species (EV-A71 [EV-A],  
104 CVB3 [EV-B], PV-1 [EV-C], EV-D68 [EV-D]) and two rhinovirus species (RV-A2 [EV-A] and RV-B14  
105 [RV-B])). RV-C was not tested, as HeLa R19 cells are unsusceptible to RV-C due to the lack of its receptor,  
106 cadherin-related family member 3 (CDHR-3) (21). All of the viruses clearly showed deficient replication  
107 in ACBD3<sup>KO</sup> HeLa cells (Fig. 1A). Replication of enteroviruses was also impaired in another human cell  
108 line, haploid human cell line HAP1, in which ACBD3 was knocked out (Fig. S2).

109 To exclude the role of ACBD3 in virus entry, we assessed viral RNA replication of subgenomic  
110 replicons of CVB3 and EV-A71 transfected in HeLa ACBD3<sup>KO</sup> cells. Replication of both replicons was  
111 reduced, which suggests a role for ACBD3 in the genome replication step (Fig. 1B). Next, to test whether  
112 ACBD3 functions in the same pathway as PI4KB in enterovirus replication, we employed a mutant virus  
113 that is less sensitive to PI4KB inhibition, CVB3 3A-H57Y (22). While the replication of wt CVB3  
114 (RlucCVB3) was impaired in ACBD3<sup>KO</sup> cells, the replication of RlucCVB3 3A-H57Y was significantly  
115 increased (Fig. 1C). Encephalomyelitis virus (EMCV), which belongs to the genus of *Cardiovirus* within  
116 *Picornaviridae* family, depends on PI4KA but not on PI4KB for generating ROs (23). The replication of  
117 EMCV was not affected in ACBD3<sup>KO</sup> cells (Fig. S3) suggesting that the inhibition of CVB3 and EV-A71  
118 replication in ACBD3<sup>KO</sup> cells is connected to the PI4KB pathway. Overall, these results indicate that  
119 ACBD3 is an important host factor for enterovirus replication.

### 120 **ACBD3 is indispensable for PI4KB recruitment.**

121 To determine the importance of ACBD3 for PI4KB recruitment during enterovirus replication, we  
122 investigated PI4KB localization in CVB3-infected ACBD3<sup>KO</sup> cells. Since we observed delayed virus  
123 replication in ACBD3<sup>KO</sup> cells (Fig. 1B), different time points were chosen for HeLa<sup>wt</sup> cells and ACBD3<sup>KO</sup>  
124 cells to mitigate possible effects of different replication levels on PI4KB recruitment. As previously shown,  
125 the CVB3 3A protein colocalized with ACBD3 (Fig. 2A) and PI4KB (Fig. 2B) throughout infection in  
126 infected HeLa<sup>wt</sup> cells, which implies that both ACBD3 and PI4KB localize to CVB3 ROs. PI4KB was more  
127 concentrated in 3A-positive cells compared to 3A-negative cells, which suggests that it is actively recruited  
128 to virus replication sites. Notwithstanding the similar level of 3A expression compared to HeLa<sup>wt</sup> cells (Fig.  
129 2A-B), no recruitment of PI4KB was observed in infected ACBD3<sup>KO</sup> cells at any time point (Fig. 2D).  
130 These results indicate that ACBD3 mediates recruitment of PI4KB during enterovirus replication.

131 Enterovirus 3A expression alone is sufficient to recruit PI4KB to membranes (9, 18, 19). To further  
132 investigate whether PI4KB recruitment by 3A is mediated by ACBD3, we transiently expressed the 3A  
133 proteins from representative human enteroviruses from seven different species (EV-A/B/C/D, RV-A/B/C)  
134 with either a C-terminal myc tag or an N-terminal GFP tag and examined the localization of ACBD3 and  
135 PI4KB (Fig. 3 and S3). In HeLa<sup>wt</sup> cells, all 3A proteins colocalized with ACBD3 (Fig. 3A). PI4KB was  
136 more concentrated in cells expressing 3A compared to cells that did not express 3A (Fig. 3B), which  
137 indicates that PI4KB is actively recruited by enterovirus 3A proteins. In contrast, no PI4KB recruitment  
138 was observed in ACBD3<sup>KO</sup> cells expressing any of the enterovirus 3A proteins (Fig. 3C). These results  
139 imply that all enteroviruses utilize a shared mechanism to recruit PI4KB to replication sites, which is via a  
140 3A-ACBD3-PI4KB interaction. Interestingly, we noticed that the localization of 3A differs from HeLa<sup>wt</sup>  
141 cells to ACBD3<sup>KO</sup> cells (Fig. 3 and S5). Unlike the punctate localization in HeLa<sup>wt</sup> cells (Fig. 3A), 3A  
142 proteins were dispersed throughout the cytoplasm in ACBD3<sup>KO</sup> cells into a more reticular pattern (Fig. 3B  
143 and S5), suggesting that ACBD3 is important for proper localization of 3A.

144 **ACBD3 is crucial for 3A localization to the Golgi.**

145 Because the typical punctate localization of 3A on Golgi-derived membranes is lost in ACBD3<sup>KO</sup> cells, we  
146 assessed the overall structure of the Golgi and ER and the colocalization between 3A and markers for the  
147 Golgi (GM130 and TGN46) and ER (Calreticulin). In mock-transfected cells, no gross differences in  
148 localization of any of the above markers were observed between HeLa<sup>wt</sup> cells and ACBD3<sup>KO</sup> cells (Fig. 4),  
149 which suggests that the lack of ACBD3 does not have a major impact on morphology of the Golgi or the  
150 ER.

151 As previously described, the disintegration of the Golgi is likely to be the consequence of the blockage of  
152 ER-to-Golgi transport that depends on the interaction between 3A and GBF1/Arf1 (24, 25). In agreement  
153 with this, overexpression of 3A caused disassembly of the Golgi apparatus in both wt and ACBD3<sup>KO</sup> HeLa  
154 cells (Fig. 4B-C) pointing out that the disruption of the Golgi by 3A occurs independently of ACBD3. 3A  
155 partially colocalized with the Golgi markers but not the ER marker in HeLa<sup>wt</sup> cells, whereas 3A was  
156 localized to the ER, as labeled by calreticulin, in ACBD3<sup>KO</sup> cells (Fig. 4B-D). This suggests that without  
157 ACBD3, 3A cannot localize to the Golgi, which may contribute to the lack of PI4KB recruitment.  
158 Collectively, our results suggest that ACBD3 is not merely a mediator between 3A and PI4KB, but plays a  
159 central role in recruiting 3A and PI4KB to facilitate virus replication.

160 **Exogenous expression of wt ACBD3 in ACBD3<sup>KO</sup> cells restores 3A localization, PI4KB recruitment,**  
161 **and enterovirus replication.**

162 To confirm that ACBD3 recruits 3A to the Golgi and mediates the interaction between 3A and PI4KB, we  
163 tested whether reconstitution of GFP-tagged ACBD3 in ACBD3<sup>KO</sup> cells can restore 3A localization and  
164 PI4KB recruitment. As a negative control, we used a Golgi localized GFP (coupled to the amino acids 1-  
165 60 of galactosyltransferase [GalT]), which failed to restore 3A localization (Fig. 5A; top panel) and PI4KB  
166 recruitment (Fig. 5B; top panel). When wt ACBD3 was reconstituted, 3A regained its punctate localization  
167 (Fig. 5A; middle panel) and PI4KB was recruited to the same sites (Fig. 5B; middle panel). ACBD3  
168 expressed without 3A was found in the Golgi, where it colocalized with giantin, but no concentrated PI4KB



169 was observed (Fig. S6). These results indicate that proper 3A localization and PI4KB recruitment by 3A  
170 depend on ACBD3.

171 ACBD3 forms a tight complex with PI4KB (16). Recently, it was reported that one or two amino  
172 substitution(s) in the Q domain of ACBD3 (F<sup>258</sup>A or F<sup>258</sup>A/Q<sup>259</sup>A) can abrogate binding to PI4KB (16, 17).  
173 We employed the F<sup>258</sup>A/Q<sup>259</sup>A mutant (hereafter called “FQ” mutant) to test whether the ACBD3-PI4KB  
174 interaction is required for PI4KB recruitment and efficient enterovirus replication. Expression of the  
175 ACBD3-FQ mutant restored the punctate localization of 3A (Fig. 5A; bottom panel) but did not support  
176 PI4KB recruitment (Fig. 5B; bottom panel). Furthermore, exogenous expression of wt ACBD3 in  
177 ACBD3<sup>KO</sup> cells restored replication of CVB3 to a level comparable to HeLa<sup>wt</sup> cells, while the negative  
178 control (GalT) and ACBD3-FQ mutant could not restore virus replication in ACBD3<sup>KO</sup> cells (Fig. 5C).  
179 Taken together, we showed that 3A localization to the Golgi-derived membranes occurs in an ACBD3-  
180 dependent manner and that the interaction between ACBD3-PI4KB is crucial for PI4KB recruitment and  
181 efficient virus replication.

182 **Reconstituted wt PI4KB in PI4KB<sup>KO</sup> cells can be recruited to the replication sites through the 3A-  
183 ACBD3-PI4KB interaction, thereby restoring enterovirus replication.**

184 PI4KB is recruited by 3A to ROs during enterovirus replication (8, 9), and depletion of PI4KB by RNAi  
185 (9) or pharmacologic inhibition (reviewed in (26)) have been shown to suppress virus replication.  
186 Enterovirus mutants resistant to inhibitors of PI4KB contain single amino acid substitutions in the 3A  
187 protein (e.g., H57Y for CVB3). CVB3 replication is impaired in PI4KB<sup>KO</sup> cells that we generated by  
188 CRISPR/Cas9 technology (Fig. S1B), while the resistant mutant virus (3A-H57Y) replicated well in  
189 PI4KB<sup>KO</sup> cells (Fig. 6A).

190 Two PI4KB mutants (I<sup>43</sup>A and D<sup>44</sup>A) were previously shown to reduce PI4KB binding to ACBD3  
191 *in vitro* (16, 17). While wt PI4KB reconstituted in PI4KB<sup>KO</sup> cells colocalized with 3A and ACBD3 (Fig.  
192 6B-C; top panel), the PI4KB-I<sup>43</sup>A mutant did not colocalize with 3A and ACBD3, and instead mostly

193 localized to the nucleus (middle panel). Unexpectedly, the D<sup>44</sup>A mutant did colocalize with 3A and ACBD3  
194 (bottom panel). In line with this, wt PI4KB and the D<sup>44</sup>A mutant could restore enterovirus replication in  
195 PI4KB<sup>KO</sup> cells, while the I<sup>43</sup>A mutant and the negative controls, EGFP and a PI4KB kinase-dead mutant  
196 that lacks catalytic activity (PI4KB-KD) could not (Fig. 6D). Why the D<sup>44</sup>A mutant behaves differently  
197 from the I<sup>43</sup>A mutant is unclear. Possibly, the D<sup>44</sup>A mutant has residual interaction with ACBD3 in cells  
198 that could not be detected *in vitro*. Nevertheless, these results imply that the interaction between ACBD3  
199 and PI4KB is important for enterovirus replication.

### 200 **Enterovirus replication does not require the ACB and CAR domains of ACBD3.**

201 Four domains are recognized in ACBD3; the acyl-CoA binding (ACB) domain, the charged amino acids  
202 region (CAR), the glutamine-rich region (Q), and the Golgi dynamics domain (GOLD) (Fig. 7A). The ACB  
203 domain, which is relatively conserved among all known ACBD proteins (ACBD1-7), has been suggested  
204 to be important for binding to long-chain acyl-CoA (27), and for binding to sterol regulatory element  
205 binding protein 1 (SREBP1) causing reduction of *de novo* palmitate synthesis (28). The CAR domain  
206 contains a nuclear localization signal (29), yet the function of the CAR domain is unknown. The Q domain  
207 interacts with the N-terminal helix of PI4KB (12, 18). The GOLD domain interacts with giantin, and by  
208 doing so, tethers ACBD3 to the Golgi membrane (29). Enterovirus and Kobuvirus 3A proteins bind to the  
209 GOLD domain, most probably at the same site as giantin (7, 18). To investigate the importance of the ACB  
210 and CAR domains for enterovirus replication we tested whether N-terminal deletion mutants of ACBD3  
211 could restore enterovirus replication in ACBD3<sup>KO</sup> cells. Mut1 and mut2, which contain intact Q and GOLD  
212 domains, could restore virus replication to a level comparable to cells reconstituted with wt ACBD3 (Fig.  
213 7B). This is in alignment with our observation that these mutants colocalize with 3A and PI4KB in ACBD3  
214 KO cells (Fig. 7C). In contrast, mut3, which contains only the GOLD domain, could not rescue virus  
215 replication (Fig. 7B) or PI4KB recruitment (Fig. 7C), like the negative controls (GalT and the FQ mutant)  
216 (Fig. 7B), even though all mutants colocalized with 3A (Fig. 7C). Of note, although mut3 and 3A  
217 colocalized in punctate structures, they also partly co-localized to reticular and nuclear envelope-like

218 structures, which may indicate that PI4KB also plays a role in firmly localizing 3A and ACBD3 to Golgi-  
219 derived membranes. These results indicate that enterovirus replication requires the Q and GOLD domains  
220 of ACBD3 for localization of viral protein 3A to the Golgi and for hijacking PI4KB.

## 221 **Discussion**

222 Both enteroviruses and kobuviruses of the *Picornaviridae* family co-opt PI4KB to build up ROs. Viral  
223 protein 3A is responsible for PI4KB recruitment to enterovirus replication sites, yet the underlying  
224 mechanism has remained elusive. Despite the direct interaction between ACBD3 and enterovirus 3A  
225 proteins (8, 18), there has not yet been a consensus about the importance of ACBD3 for enterovirus  
226 replication and PI4KB recruitment. Previously, we observed no inhibition on CVB3 and RV replication  
227 and no effects on PI4KB recruitment, even though more than 90% of ACBD3-knockdown was achieved  
228 by siRNA (18, 19). In the present study in which we use ACBD3<sup>KO</sup> cells, we showed that ACBD3 is an  
229 important host factor for replication of four different human enterovirus species (EV-A/B/C/D) and two  
230 rhinovirus species (RV-A/B). All viruses showed impaired growth in ACBD3<sup>KO</sup> cells (Fig. 1 and S2). In  
231 addition, neither virus infection (Fig. 2) nor the expression of enterovirus 3A proteins alone (Fig. 3) elicited  
232 PI4KB recruitment in the absence of ACBD3. In agreement with our data, the inhibition of EV-A71 and  
233 CVB3 was recently reported in ACBD3<sup>KO</sup> cells (30-32). The discrepancy in the role of ACBD3 from KD  
234 to KO condition could result from insufficient suppression of ACBD3 function by RNA interference. In  
235 fact, this implicates that the small amounts (~10%) of ACBD3 that remained after knockdown is sufficient  
236 to support enterovirus replication and PI4KB recruitment. Similar issues on the differences between  
237 knockdown and knockout have been raised (33). For instance, the importance of cyclophilin A (CypA) in  
238 nidovirus replication was only prominent in CypA knockout cells but not in knockdown condition, even  
239 though CypA protein was undetectable after knockdown (34).

240 We observed that the lack of ACBD3 has a profound effect on enterovirus 3A protein localization.  
241 3A proteins were found almost exclusively at the ER in ACBD3<sup>KO</sup> cells (Fig. 4D), whereas in HeLa<sup>wt</sup> cells

242 they showed a punctate localization mostly on Golgi-derived membranes (Fig. 4B-C). Upon reconstitution  
243 of wt ACBD3 in ACBD3<sup>KO</sup> cells, the localization of 3A was restored to a punctate pattern (Fig. 5A). These  
244 findings hint at a new role of ACBD3 for enterovirus replication, which is more than merely being a  
245 connector between 3A proteins and PI4KB.

246         Considering that ACBD3 is involved in several different protein complexes, enteroviruses may  
247 take advantage of ACBD3 in several ways, more than just for PI4KB recruitment. ACBD3 may be a  
248 scaffold responsible for positioning 3A near cellular factors, including other ACBD3-interacting proteins,  
249 required for RO formation. For example, ACBD3 and PV1 3A were found in a protein complex together  
250 with the putative Rab33 GTPase-activating proteins TBC1D22A/B (35). In addition, several Golgi stacking  
251 proteins such as Golgin45 and Golgi reassembly stacking protein 2 (GORASP2) were recently identified  
252 as novel interaction partners of ACBD3, and ACBD3 was proposed as a scaffold tethering Golgin45,  
253 GRASP55, and TBC1D22 for the formation of a Golgi cisternal adhesion complex at the medial Golgi (36).  
254 It is largely unknown which domains of ACBD3 are responsible for the interaction with the above-  
255 mentioned interacting partners, and whether these proteins are recruited to enterovirus ROs also remains to  
256 be investigated.

257         The GOLD domain of ACBD3 is responsible for the interaction with enterovirus 3A protein (18,  
258 35), while the Q domain interacts with PI4KB (16, 17). By utilizing mutants of ACBD3 or PI4KB which  
259 disturb the interaction with each other (Fig. 5 and 7), we show for the first time that the interaction between  
260 ACBD3 and PI4KB is crucial for enterovirus replication. Aside from the Q and GOLD domains, other  
261 domains (i.e., ACB and CAR) of ACBD3 seem to be not involved in enterovirus replication (Fig. 7). This  
262 indicates that the functions of the ACB and CAR domains, as well as the cellular proteins and/or lipids that  
263 interact with these domains, are unlikely required for enterovirus replication. Although we cannot exclude  
264 that additional or unidentified proteins that bind to the Q or GOLD domains of ACBD3 might also be  
265 important for enterovirus replication, our findings suggest that ACBD3 mainly serves as a mediator of  
266 PI4KB recruitment to ROs, involving the Q and GOLD domains.

267           How exactly enterovirus 3A protein interacts with ACBD3 needs to be further investigated. The  
268 GOLD domain of ACBD3 interacts with enterovirus 3A proteins (18). Similarly, kobuvirus 3A interacts  
269 with the ACBD3 GOLD domain and the crystal structure of kobuvirus 3A in complex with the ACBD3  
270 GOLD domain was revealed recently (6). According to this structure, kobuvirus 3A wraps ACBD3 and  
271 stabilizes ACBD3 on membranes through the membrane-binding features at the myristoylated N-terminal  
272 and hydrophobic C-terminal ends of 3A. However, enterovirus 3A proteins can bind to membranes only  
273 through the hydrophobic C-terminus, and the 3A proteins of enteroviruses differ greatly in sequence from  
274 kobuvirus 3A. Therefore, the way by which enterovirus 3A interacts with ACBD3 could be different from  
275 kobuvirus. Thus, structural insight into the enterovirus 3A - ACBD3 GOLD complex is urgently required  
276 to understand how enterovirus 3A interacts with ACBD3.

277           In conclusion, our study reveals that enteroviruses employ a conserved mechanism to recruit PI4KB,  
278 which depends on the Golgi-residing protein ACBD3. Furthermore, we suggest that ACBD3 tethers viral  
279 and host proteins to form ROs. Considering the pan-enteroviral dependency on ACBD3, targeting ACBD3  
280 or the 3A-ACBD3 interaction presents as a novel strategy for broad-spectrum antiviral drug development.  
281

## 282 **Materials and Methods**

### 283 **Cells and culture conditions**

284 HAP1<sup>wt</sup> cells and HAP1 ACBD3<sup>KO</sup> cells were obtained from Horizon Discovery. HeLa R19 cells were  
285 obtained from G. Belov (University of Maryland and Virginia-Maryland Regional College of Veterinary  
286 Medicine, US). HAP1 cells were cultured in IMDM (ThermoFisher Scientific) supplemented with 10%  
287 fetal calf serum (FCS) and penicillin–streptomycin. HeLa cells were cultured in DMEM (Lonza)  
288 supplemented with 10% FCS and penicillin–streptomycin. All cells were grown at 37°C in 5% CO<sub>2</sub>.

### 289 **Viruses**

290 The following enteroviruses were used: EV-A71 (strain BrCr, obtained from the National Institute for  
291 Public Health and Environment; RIVM, The Netherlands), CVB3 (strain Nancy, obtained by transfection  
292 of the infectious clone p53CB3/T7 as described previously (37)), RlucCVB3, RlucCVB3 3A-H57Y  
293 (obtained by transfection of infectious clones pRLuc-53CB3/T7 as described previously (22)), RlucEMCV  
294 (strain Mengovirus, obtained by transfection of the infectious clone pRLuc-QG-M16.1 as described  
295 previously (38)), PV1 (strain Sabin, ATCC), EV-D68 (strain Fermon, obtained from RIVM, The  
296 Netherlands), RV-2 and RV-14 (obtained from Joachim Seipelt, Medical University of Vienna, Austria).  
297 Virus titers were determined by end-point titration analysis and expressed as 50% tissue culture infectious  
298 dose (TCID<sub>50</sub>).

### 299 **Virus infection**

300 Virus infections were carried out by incubating subconfluent HAP1 or HeLa cells for 30 min with virus.  
301 Following virus removal, fresh medium or medium containing the control inhibitors guanidine  
302 hydrochloride (2 mM) or dipyridamole (100 μM) was added to the cells. To determine one-step growth  
303 kinetics for each virus, infected cells were frozen from 2 to 16 h post infection (p.i.). Virus titers were  
304 determined by end-point titration analysis and expressed as 50% tissue culture infectious dose (TCID<sub>50</sub>).

305 To check for the recruitment of PI4KB upon virus replication, cells were fixed for immunofluorescence  
306 staining as described in below section separately. To check genome replication by measuring intracellular  
307 *Renilla* luciferase activity, cells were lysed at 8 h p.i. and followed the manufacturer's protocol (*Renilla*  
308 luciferase assay system; Promega).

### 309 **RNA transfection**

310 The subgenomic replicons of CVB3 (10) and EV-A71 (39) were described previously. HeLa cells were  
311 transfected with RNA transcripts of replicon constructs. After 7 h, cells were lysed to determine intracellular  
312 firefly luciferase activity.

### 313 **Plasmids**

314 p3A(CVB3)-myc (25), pEGFP-3A(RV-2), and pEGFP-3A(RV-14) were described previously (19).  
315 p3A(EV-A71)-myc, p3A(PV1)-myc, pEGFP-3A(EV-D68), and pEGFP-3A(RV-C15) were prepared by  
316 cloning cDNA encoding EV-A71 and PV1 3A into p3A(CVB3)-myc vectors from which CVB3 3A was  
317 excised using restriction enzyme sites Sall and BamHI, and EV-D68 and RV-C15 3A into pEGFP vectors  
318 using restriction enzyme sites BglII and BamHI. pEGFP-GalT was a gift from Jennifer Lippincott-Schwartz  
319 (Addgene plasmid #11929). pEGFP-ACBD3 was a gift from Carolyn E. Machamer (Johns Hopkins  
320 University, USA). pEGFP-ACBD3-FQ and pEGFP-ACBD3-mut1/mut2/mut3 were generated by using Q5  
321 Site-Directed Mutagenesis kit (New England BioLabs). pCDNA3-PI4KB(wt)-HA was a gift from Tamas  
322 Balla (NIH, USA). pCDNA3-PI4KB(D671A) (KD: kinase activity dead mutant), pCDNA3-PI4KB(I43A),  
323 and pCDNA3-PI4KB(D44A) were generated by using Q5 Site-Directed Mutagenesis kit (New England  
324 BioLabs).

### 325 **Replication rescue assay**

326 HeLa cells were transfected with plasmids carrying wt or mutant ACBD3 (FQ, mut1, mut2, mut3), wt or  
327 mutant PI4KB (I43A, D44A), Golgi-targeting EGFP (pEGFP-GalT) or kinase-dead PI4KB (PI4KB-KD)

328 as a negative control. At 24 h post transfection, the cells were infected with CVB3-Rluc. At 8 h p.i., the  
329 intracellular *Renilla* luciferase activity was determined by using the *Renilla* luciferase assay system  
330 (Promega).

### 331 **Antibodies**

332 The rabbit antiserum and the mouse monoclonal antibody against CVB3 3A were described previously (18,  
333 24). Mouse monoclonal antibodies included anti-ACBD3 (Sigma), anti-myc (Sigma), anti-GM130 (BD  
334 Biosciences), anti-Giantin (a gift from Marjolein Kikkert, Leiden University Medical Center, The  
335 Netherlands). Rabbit polyclonal antibodies included anti-PI4KB (Millipore), anti-myc (Thermo Scientific),  
336 anti-TGN46 (Novus Biologicals), anti-Calreticulin (Sigma), anti-HA (Santa Cruz). Conjugated goat anti-  
337 rabbit and goat anti-mouse Alexa Fluor 488, 596, or 647 (Molecular Probes) were used as secondary  
338 antibodies for immunofluorescence analysis. For Western Blot analysis, IRDye goat anti-mouse or anti-  
339 rabbit (LI-COR) were used.

### 340 **Immunofluorescence microscopy**

341 HeLa cells were grown on coverslips in 24-well plates. Subconfluent cells were transfected with 200 ng of  
342 plasmids using Lipofectamine 2000 (Thermo) according to the manufacturer's protocol or infected with  
343 CVB3 at an MOI of 5. At 16 h post transfection (p.t.) or 5-9 h p.i., cells were fixed with 4%  
344 paraformaldehyde for 15 min at room temperature. After permeabilization with 0.1% Triton X-100 in PBS  
345 for 5 min, cells were incubated with primary and secondary antibodies diluted in 2% normal goat serum in  
346 PBS. Nuclei were stained with DAPI. Coverslips were mounted with FluorSave (Calbiochem), and confocal  
347 imaging was performed with a Leica SpeII confocal microscope.

### 348 **Western blot analysis**

349 HAP1 and HeLa cells were harvested and lysed by TEN-lysis buffer (50 mM TrisHCl pH 7.4, 150 mM  
350 NaCl, 1 mM EDTA, 1% NP-40, 0.05% SDS). After 30 min incubation on ice, lysates were centrifuged for



351 20 min at 10,000 xg. Supernatants were boiled in Laemmli sample buffer for 5 min at 95°C. Samples were  
352 run on polyacrylamide gels and transferred to a PVDF membrane (Bio-Rad). Membranes were sequentially  
353 incubated with primary antibody against ACBD3 or PI4KB at 4°C overnight and secondary antibodies  
354 against mouse IgG or rabbit IgG for 1h at room temperature. Images were acquired with an Odyssey  
355 imaging system (LI-COR).

356

357 **References**

- 358 1. Tapparel C, Siegrist F, Petty TJ, Kaiser L. 2013. Picornavirus and enterovirus diversity with  
359 associated human diseases. *Infect Genet Evol* 14:282-93.
- 360 2. Belov GA, van Kuppeveld FJM. 2012. (+)RNA viruses rewire cellular pathways to build  
361 replication organelles. *Curr Opin Virol* 2:740-747.
- 362 3. Miller S, Krijnse-Locker J. 2008. Modification of intracellular membrane structures for virus  
363 replication. *Nat Rev Microbiol* 6:363.
- 364 4. Nagy PD, Pogany J. 2011. The dependence of viral RNA replication on co-opted host factors. *Nat*  
365 *Rev Microbiol* 10:137.
- 366 5. Paul D, Bartenschlager R. 2013. Architecture and biogenesis of plus-strand RNA virus replication  
367 factories. *World J Virol* 2:32-48.
- 368 6. Klima M, Chalupska D, Rozycki B, Humpolickova J, Rezacikova L, Silhan J, Baumlova A,  
369 Dubankova A, Boura E. 2017. Kobuviral Non-structural 3A Proteins Act as Molecular Harnesses  
370 to Hijack the Host ACBD3 Protein. *Structure* 25:219-230.
- 371 7. Sasaki J, Ishikawa K, Arita M, Taniguchi K. 2012. ACBD3-mediated recruitment of PI4KB to  
372 picornavirus RNA replication sites. *EMBO J* 31:754-66.
- 373 8. Greninger AL, Knudsen GM, Betegon M, Burlingame AL, Derisi JL. 2012. The 3A protein from  
374 multiple picornaviruses utilizes the golgi adaptor protein ACBD3 to recruit PI4KIIIbeta. *J Virol*  
375 86:3605-16.
- 376 9. Hsu NY, Ilynska O, Belov G, Santiana M, Chen YH, Takvorian PM, Pau C, van der Schaar H,  
377 Kaushik-Basu N, Balla T, Cameron CE, Ehrenfeld E, van Kuppeveld FJ, Altan-Bonnet N. 2010.  
378 Viral reorganization of the secretory pathway generates distinct organelles for RNA replication.  
379 *Cell* 141:799-811.
- 380 10. Lanke KH, van der Schaar HM, Belov GA, Feng Q, Duijsings D, Jackson CL, Ehrenfeld E, van  
381 Kuppeveld FJ. 2009. GBF1, a guanine nucleotide exchange factor for Arf, is crucial for  
382 coxsackievirus B3 RNA replication. *J Virol* 83:11940-9.

- 383 11. Ishikawa-Sasaki K, Sasaki J, Taniguchi K. 2014. A Complex Comprising Phosphatidylinositol 4-  
384 Kinase III $\beta$ , ACBD3, and Aichi Virus Proteins Enhances Phosphatidylinositol 4-Phosphate  
385 Synthesis and Is Critical for Formation of the Viral Replication Complex. *J Virol* 88:6586-6598.
- 386 12. Levine TP, Munro S. 2002. Targeting of Golgi-specific pleckstrin homology domains involves both  
387 PtdIns 4-kinase-dependent and -independent components. *Curr Biol* 12:695-704.
- 388 13. Mesmin B, Bigay J, Moser von Filseck J, Lacas-Gervais S, Drin G, Antony B. 2013. A four-step  
389 cycle driven by PI(4)P hydrolysis directs sterol/PI(4)P exchange by the ER-Golgi tether OSBP.  
390 *Cell* 155:830-43.
- 391 14. Strating JR, van der Linden L, Albulescu L, Bigay J, Arita M, Delang L, Leyssen P, van der Schaar  
392 HM, Lanke KH, Thibaut HJ, Ulferts R, Drin G, Schlinck N, Wubbolts RW, Sever N, Head SA, Liu  
393 JO, Beachy PA, De Matteis MA, Shair MD, Olkkonen VM, Neyts J, van Kuppeveld FJ. 2015.  
394 Itraconazole inhibits enterovirus replication by targeting the oxysterol-binding protein. *Cell Rep*  
395 10:600-15.
- 396 15. Godi A, Pertile P, Meyers R, Marra P, Di Tullio G, Iurisci C, Luini A, Corda D, De Matteis MA.  
397 1999. ARF mediates recruitment of PtdIns-4-OH kinase-beta and stimulates synthesis of  
398 PtdIns(4,5)P<sub>2</sub> on the Golgi complex. *Nat Cell Biol* 1:280-7.
- 399 16. Klima M, Toth DJ, Hexnerova R, Baumlova A, Chalupska D, Tykvart J, Rezabkova L, Sengupta  
400 N, Man P, Dubankova A, Humpolickova J, Nencka R, Veverka V, Balla T, Boura E. 2016.  
401 Structural insights and in vitro reconstitution of membrane targeting and activation of human  
402 PI4KB by the ACBD3 protein. *Sci Rep* 6:23641.
- 403 17. McPhail JA, Ottosen EH, Jenkins ML, Burke JE. 2017. The Molecular Basis of Aichi Virus 3A  
404 Protein Activation of Phosphatidylinositol 4 Kinase IIIbeta, PI4KB, through ACBD3. *Structure*  
405 25:121-131.
- 406 18. Dorobantu CM, van der Schaar HM, Ford LA, Strating JR, Ulferts R, Fang Y, Belov G, van  
407 Kuppeveld FJ. 2014. Recruitment of PI4KIIIbeta to coxsackievirus B3 replication organelles is  
408 independent of ACBD3, GBF1, and Arf1. *J Virol* 88:2725-36.

- 409 19. Dorobantu CM, Ford-Siltz LA, Sittig SP, Lanke KH, Belov GA, van Kuppeveld FJ, van der Schaar  
410 HM. 2015. GBF1- and ACBD3-independent recruitment of PI4KIIIbeta to replication sites by  
411 rhinovirus 3A proteins. *J Virol* 89:1913-8.
- 412 20. Teoule F, Brisac C, Pelletier I, Vidalain PO, Jegouic S, Mirabelli C, Bessaud M, Combelas N,  
413 Autret A, Tangy F, Delpyroux F, Blondel B. 2013. The Golgi protein ACBD3, an interactor for  
414 poliovirus protein 3A, modulates poliovirus replication. *J Virol* 87:11031-46.
- 415 21. Bochkov YA, Watters K, Ashraf S, Griggs TF, Devries MK, Jackson DJ, Palmenberg AC, Gern  
416 JE. 2015. Cadherin-related family member 3, a childhood asthma susceptibility gene product,  
417 mediates rhinovirus C binding and replication. *Proc Natl Acad Sci U S A* 112:5485-90.
- 418 22. van der Schaar HM, van der Linden L, Lanke KH, Strating JR, Purstinger G, de Vries E, de Haan  
419 CA, Neyts J, van Kuppeveld FJ. 2012. Coxsackievirus mutants that can bypass host factor  
420 PI4KIIIbeta and the need for high levels of PI4P lipids for replication. *Cell Res* 22:1576-92.
- 421 23. Dorobantu CM, Albulescu L, Harak C, Feng Q, van Kampen M, Strating JR, Gorbalenya AE,  
422 Lohmann V, van der Schaar HM, van Kuppeveld FJ. 2015. Modulation of the Host Lipid Landscape  
423 to Promote RNA Virus Replication: The Picornavirus Encephalomyocarditis Virus Converges on  
424 the Pathway Used by Hepatitis C Virus. *PLoS Pathog* 11:e1005185.
- 425 24. Wessels E, Duijsings D, Niu TK, Neumann S, Oorschot VM, de Lange F, Lanke KH, Klumperman  
426 J, Henke A, Jackson CL, Melchers WJ, van Kuppeveld FJ. 2006. A viral protein that blocks Arf1-  
427 mediated COP-I assembly by inhibiting the guanine nucleotide exchange factor GBF1. *Dev Cell*  
428 11:191-201.
- 429 25. Wessels E, Duijsings D, Lanke KH, Melchers WJ, Jackson CL, van Kuppeveld FJ. 2007. Molecular  
430 determinants of the interaction between coxsackievirus protein 3A and guanine nucleotide  
431 exchange factor GBF1. *J Virol* 81:5238-45.
- 432 26. Bauer L, Lyoo H, van der Schaar HM, Strating JR, van Kuppeveld FJ. 2017. Direct-acting antivirals  
433 and host-targeting strategies to combat enterovirus infections. *Curr Opin Virol* 24:1-8.

- 434 27. Fan J, Liu J, Culty M, Papadopoulos V. 2010. Acyl-coenzyme A binding domain containing 3  
435 (ACBD3; PAP7; GCP60): an emerging signaling molecule. *Prog Lipid Res* 49:218-34.
- 436 28. Chen Y, Patel V, Bang S, Cohen N, Millar J, Kim SF. 2012. Maturation and activity of sterol  
437 regulatory element binding protein 1 is inhibited by acyl-CoA binding domain containing 3. *PLoS*  
438 *One* 7:e49906.
- 439 29. Sohda M, Misumi Y, Yamamoto A, Yano A, Nakamura N, Ikehara Y. 2001. Identification and  
440 characterization of a novel Golgi protein, GCP60, that interacts with the integral membrane protein  
441 giantin. *J Biol Chem* 276:45298-306.
- 442 30. Lei X, Xiao X, Zhang Z, Ma Y, Qi J, Wu C, Xiao Y, Zhou Z, He B, Wang J. 2017. The Golgi  
443 protein ACBD3 facilitates Enterovirus 71 replication by interacting with 3A. *Sci Rep* 7:44592.
- 444 31. Xiao X, Lei X, Zhang Z, Ma Y, Qi J, Wu C, Xiao Y, Li L, He B, Wang J. 2017. Enterovirus 3A  
445 facilitates viral replication by promoting PI4KB-ACBD3 interaction. *J Virol*  
446 doi:10.1128/JVI.00791-17.
- 447 32. Kim HS, Lee K, Kim SJ, Cho S, Shin HJ, Kim C, Kim JS. 2018. Arrayed CRISPR screen with  
448 image-based assay reliably uncovers host genes required for coxsackievirus infection. *Genome Res*  
449 doi:10.1101/gr.230250.117.
- 450 33. Morgens DW, Deans RM, Li A, Bassik MC. 2016. Systematic comparison of CRISPR/Cas9 and  
451 RNAi screens for essential genes. *Nat Biotechnol* 34:634.
- 452 34. de Wilde AH, Zevenhoven-Dobbe JC, Beugeling C, Chatterji U, de Jong D, Galloway P, Szuhai K,  
453 Posthuma CC, Snijder EJ. 2018. Coronaviruses and arteriviruses display striking differences in  
454 their cyclophilin A-dependence during replication in cell culture. *Virology* 517:148-156.
- 455 35. Greninger AL, Knudsen GM, Betegon M, Burlingame AL, DeRisi JL. 2013. ACBD3 interaction  
456 with TBC1 domain 22 protein is differentially affected by enteroviral and kobuviral 3A protein  
457 binding. *MBio* 4:e00098-13.

- 458 36. Yue X, Bao M, Christiano R, Li S, Mei J, Zhu L, Mao F, Yue Q, Zhang P, Jing S, Rothman JE,  
459 Qian Y, Lee I. 2017. ACBD3 functions as a scaffold to organize the Golgi stacking proteins and a  
460 Rab33b-GAP. *FEBS Lett* 591:2793-2802.
- 461 37. Wessels E, Duijsings D, Notebaart RA, Melchers WJ, van Kuppeveld FJ. 2005. A proline-rich  
462 region in the coxsackievirus 3A protein is required for the protein to inhibit endoplasmic reticulum-  
463 to-golgi transport. *J Virol* 79:5163-73.
- 464 38. Albuлесcu L, Wubbolts R, van Kuppeveld FJ, Strating JR. 2015. Cholesterol shuttling is important  
465 for RNA replication of coxsackievirus B3 and encephalomyocarditis virus. *Cell Microbiol*  
466 17:1144-56.
- 467 39. van der Schaar HM, Leyssen P, Thibaut HJ, de Palma A, van der Linden L, Lanke KH, Lacroix C,  
468 Verbeken E, Conrath K, Macleod AM, Mitchell DR, Palmer NJ, van de Poel H, Andrews M, Neyts  
469 J, van Kuppeveld FJ. 2013. A novel, broad-spectrum inhibitor of enterovirus replication that targets  
470 host cell factor phosphatidylinositol 4-kinase IIIbeta. *Antimicrob Agents Chemother* 57:4971-81.

471

472 **Figure Legends**

473 **Figure 1. ACBD3 is crucial for enterovirus replication.**

474 (A) Growth curves of enteroviruses in HeLa<sup>wt</sup> and ACBD3<sup>KO</sup> cells. After infection for 30min at an MOI 5,  
475 cells were incubated for the indicated times. Then, cells were freeze-thawed three times to harvest infectious  
476 virus particles. Total virus titers were determined by endpoint dilution. (B) RNA replication of CVB3 and  
477 EV-A71 virus in HeLa ACBD3<sup>KO</sup> cells. HeLa<sup>wt</sup> and ACBD3<sup>KO</sup> cells were transfected with *in vitro*  
478 transcribed RNA of the CVB3 or EV-A71 subgenomic replicons encoding firefly luciferase in place of the  
479 capsid region. After 7 h, cells were lysed to determine the intracellular luciferase activity. (C) RNA  
480 replication of CVB3 mutant in ACBD3<sup>KO</sup> cells. HeLa<sup>wt</sup> and ACBD3<sup>KO</sup> cells were infected with wt or 3A-  
481 H57Y mutant CVB3 reporter viruses carrying a *Renilla* luciferase (RlucCVB3) at an MOI 0.1. After 8 h,  
482 cells were lysed to determine luciferase activity. Bars represent the mean of triplicate values  $\pm$  SEM. Values  
483 were statistically evaluated using a two-tailed paired t-test. \*\*, =  $P < 0.01$ ; \*\*\*, =  $P < 0.001$ .

484

485 **Figure 2. PI4KB recruitment to virus replication sites depends on ACBD3.**

486 (A and B) HeLa<sup>wt</sup> and (C and D) ACBD3<sup>KO</sup> cells were infected with CVB3 wt at an MOI of 5. At indicated  
487 time points, cells were fixed and stained with antibodies against CVB3 3A and ACBD3 (A and C) or CVB3  
488 3A and PI4KB (B and D). Nuclei were stained with DAPI (blue). Asterisks indicate infected cells. Scale  
489 bars represent 10  $\mu$ m.

490

491 **Figure 3. Effects of ACBD3 knockout on the localization of enterovirus 3A proteins and the**  
492 **recruitment of PI4KB.**

493 (A) HeLa<sup>wt</sup> and (B) ACBD3<sup>KO</sup> cells were transfected with myc-tagged EV-A71 3A, CVB3 3A, PV-1 3A,  
494 or EGFP-tagged EV-D68 3A, RV-2 3A, RV-14 3A. The next day, cells were fixed and stained with  
495 antibodies against the myc tag to detect 3A, ACBD3, or PI4KB. Asterisks indicate 3A expressing cells.  
496 Nuclei were stained with DAPI (blue). Scale bars represent 10  $\mu$ m.

497

498 **Figure 4. The localization of 3A differs between HeLa<sup>WT</sup> cells and ACBD3<sup>KO</sup> cells.**

499 (A) Golgi and ER integrity in ACBD3<sup>KO</sup> cells. HeLa<sup>wt</sup> and ACBD3<sup>KO</sup> cells were fixed and stained with  
500 antibodies against the Golgi markers GM130 and TGN46 or the ER marker calreticulin. (B-D) HeLa<sup>wt</sup> and  
501 ACBD3<sup>KO</sup> cells were transfected with myc-tagged CVB3 3A. The next day, cells were fixed and stained  
502 with an antibody against the myc tag to detect 3A and with antibodies against GM130 (B), TGN46 (C), or  
503 calreticulin (D). Nuclei were stained with DAPI (blue). Scale bars represent 10  $\mu$ m.

504

505 **Figure 5. Reconstitution of wt ACBD3 but not ACBD3-FQ mutant rescues PI4KB recruitment and**  
506 **CVB3 replication.**

507 (A and B) HeLa ACBD3<sup>KO</sup> cells were co-transfected with myc-tagged CVB3 3A and EGFP-tagged GalT,  
508 ACBD3 wt, or ACBD3-FQ mutant. The next day, cells were fixed and stained with the antibodies against  
509 the myc tag to detect 3A (A) or PI4KB (B). Nuclei were stained with DAPI (blue). Scale bars represent 10  
510  $\mu$ m. (C) HeLa<sup>wt</sup> and ACBD3<sup>KO</sup> cells were transfected with EGFP-tagged GalT, ACBD3 wt, or ACBD3-FQ  
511 mutant. At 24 h p.t., cells were infected with RlucCVB3 at an MOI of 0.1. After 8 h, cells were lysed to  
512 determine luciferase activity. Bars represent the mean of triplicate values  $\pm$  SEM. Values were statistically  
513 evaluated compared to the EGFP control using a one-way ANOVA. \*\*\*, =  $P < 0.001$ ; N.S., not significant.

514 **Figure 6. A PI4KB mutant, which does not interact with ACBD3, cannot be recruited by 3A and**  
515 **cannot restore virus replication in PI4KB<sup>KO</sup> cells.**

516 (A) RNA replication of CVB3 mutant in PI4KB<sup>KO</sup> cells. HeLa<sup>wt</sup> cells and two PI4KB<sup>KO</sup> cell clones were  
517 infected with wt or 3A-H57Y mutant CVB3 reporter viruses carrying a *Renilla* luciferase (RlucCVB3) at  
518 an MOI 0.1. After 8 h, cells were lysed to determine luciferase activity. Bars represent the mean of triplicate  
519 values  $\pm$  SEM. Values were statistically evaluated using a two-tailed paired t-test. \*\*, =  $P < 0.01$ ; \*\*\*, =  $P$   
520  $< 0.001$ . (B, C) HeLa PI4KB<sup>KO</sup> cells were co-transfected with myc-tagged CVB3 3A and HA-tagged PI4KB  
521 wt, PI4KB-I<sup>43</sup>A or D<sup>44</sup>A mutants. The next day, cells were fixed and stained with antibodies against the HA  
522 tag to detect PI4KB and against the myc tag to detect 3A (B) or against ACBD3 (C). Nuclei were stained  
523 with DAPI (blue). Scale bars represent 10  $\mu$ m. (D) HeLa<sup>wt</sup> and PI4KB<sup>KO</sup> cells were transfected with EGFP,



524 HA-tagged PI4KB wt, PI4KB-I<sup>43</sup>A or D<sup>44</sup>A mutants. At 24 h p.t., cells were infected with RlucCVB3 at an  
525 MOI of 0.1. After 8 h, cells were lysed to determine luciferase activity. Bars represent the mean of triplicate  
526 values  $\pm$  SEM. Values were statistically evaluated compared to the EGFP control using a one-way ANOVA.  
527 \*\*\*, =  $P < 0.001$ ; N.S., not significant.

528

529 **Figure 7. The Q and GOLD domains of ACBD3 are sufficient to support proper 3A localization,**  
530 **PI4KB recruitment, and enterovirus replication.**

531 (A) Schematic representation of full-length ACBD3 and its N-terminal deletion mutants (mut1-3). ACBD3  
532 contains the acyl-CoA binding (ACB) domain, the charged amino acids region (CAR), the glutamine rich  
533 (Q) domain, and the Golgi dynamics domain (GOLD). Numbers indicate amino-acid positions. (B) HeLa<sup>wt</sup>  
534 and ACBD3<sup>KO</sup> cells were transfected with EGFP-tagged GalT, ACBD3 wt, ACBD3-FQ mutant, or ACBD3  
535 N-terminal deletion mutants (mut1-3). At 24 h p.t., cells were infected with RlucCVB3 at an MOI of 0.1.  
536 After 8 h, cells were lysed to determine luciferase activity. Bars represent the mean of triplicate values  $\pm$   
537 SEM. Values were statistically evaluated compared to the EGFP control using a one-way ANOVA. \*\*\*\*\*,  
538 =  $P < 0.0001$ ; N.S., not significant. (C) HeLa ACBD3<sup>KO</sup> cells were co-transfected with myc-tagged CVB3  
539 3A and EGFP-tagged ACBD3 wt, or ACBD3 N-terminal deletion mutants (mut1-3). The next day, cells  
540 were fixed and stained with the antibodies against PI4KB (red) and the myc tag to detect 3A (light blue) or.  
541 Nuclei were stained with DAPI (blue). Scale bars represent 10  $\mu$ m.

542

543 **Acknowledgments:** This work was supported by research grants from the Netherlands Organisation for  
544 Scientific Research (NWO-VENI-863.12.005 to HMvdS, NWO-VENI-722.012.066 to JRPMS, NWO-  
545 VICI-91812628, NWO-ECHO-711.017.002 and ERASysApp project ‘SysVirDrug’ ALW project number  
546 832.14.003 to FJMvK) and from the European Union (Horizon 2020 Marie Skłodowska-Curie ETN  
547 ‘EUVIRNA’, grant agreement number 264286 and ‘ANTIVIRALS’, grant agreement number 642434 to  
548 FJMvK).

549 **Conflicts of Interest:** The authors declare no conflict of interest. The sponsors had no role in the design of  
550 the study; in the collection, analyses, or interpretation of data; in the writing of the manuscript, and in the  
551 decision to publish the results.

552

**A**

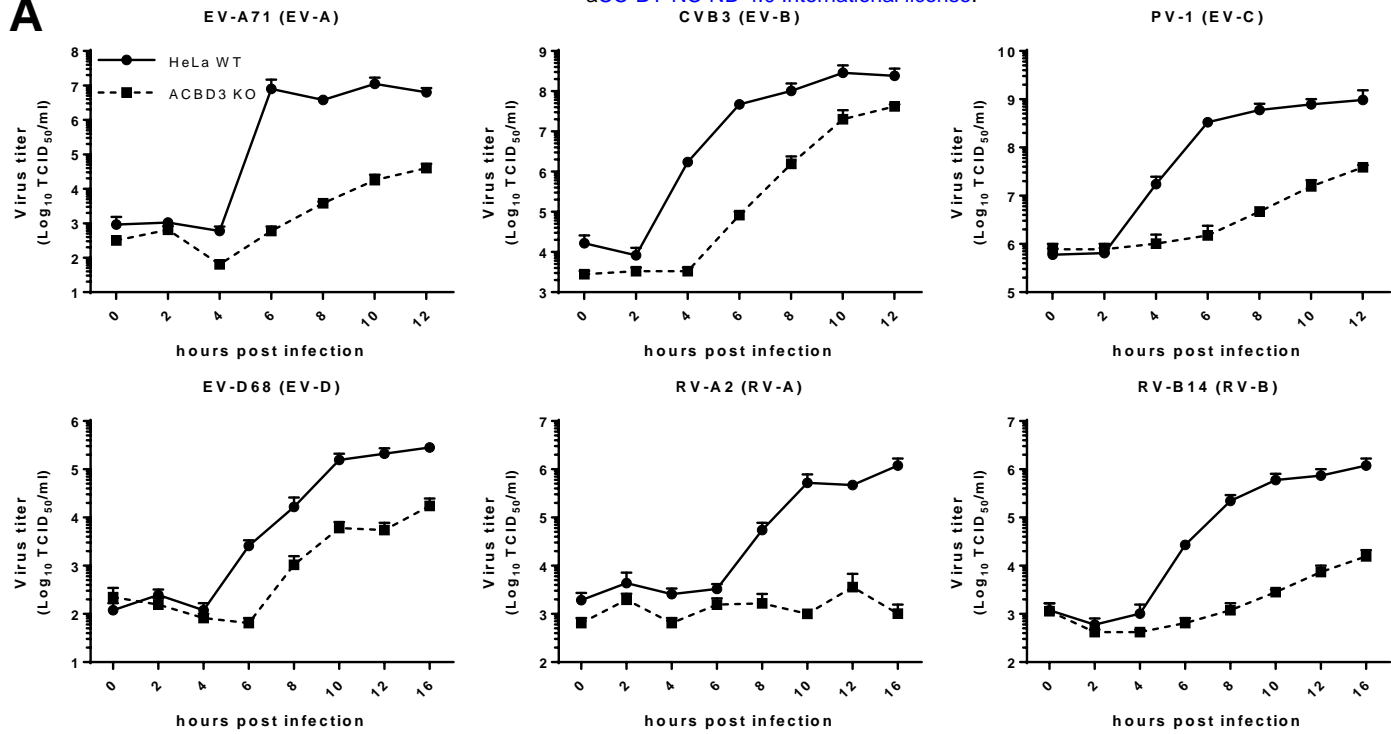

**B**

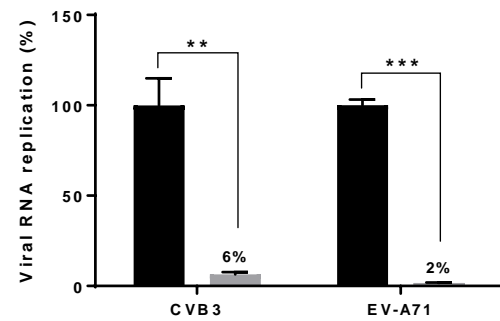

**C**

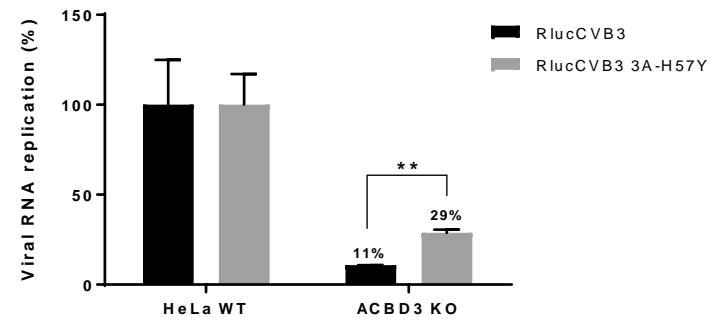

Figure 1. ACBD3 is crucial for enterovirus replication.

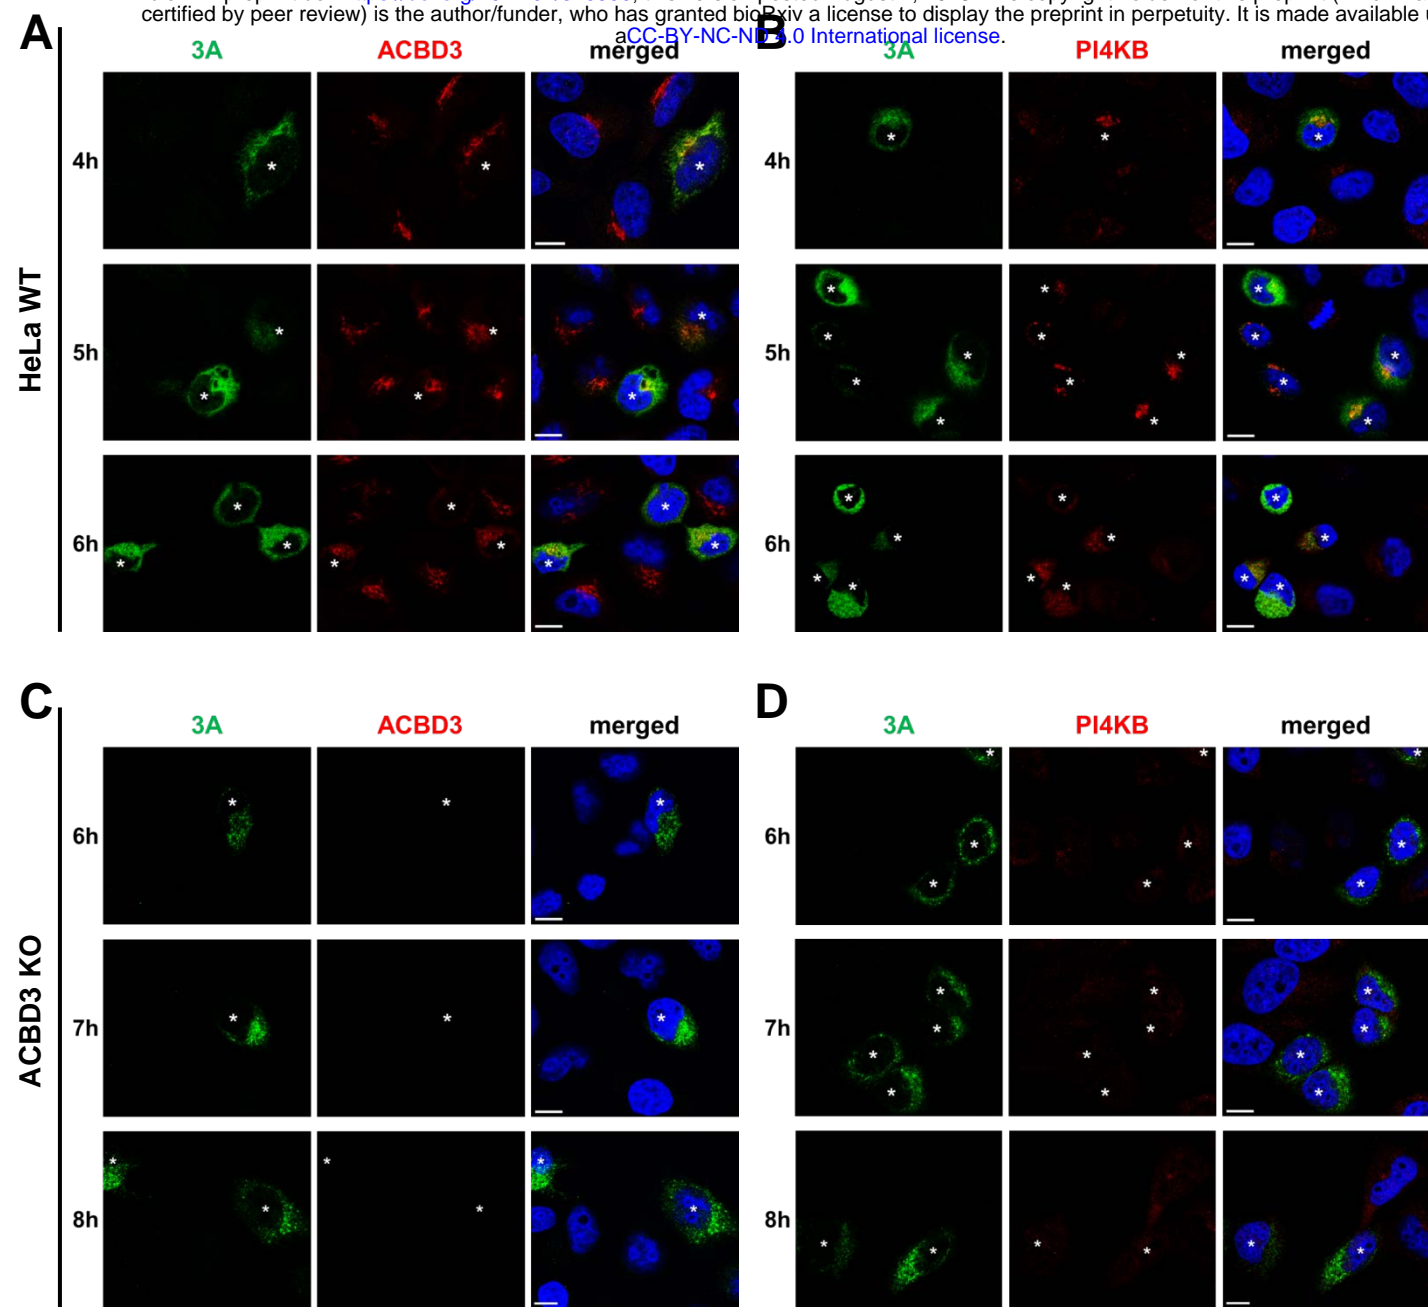

Figure 2. PI4KB recruitment to virus replication sites depends on ACBD3.

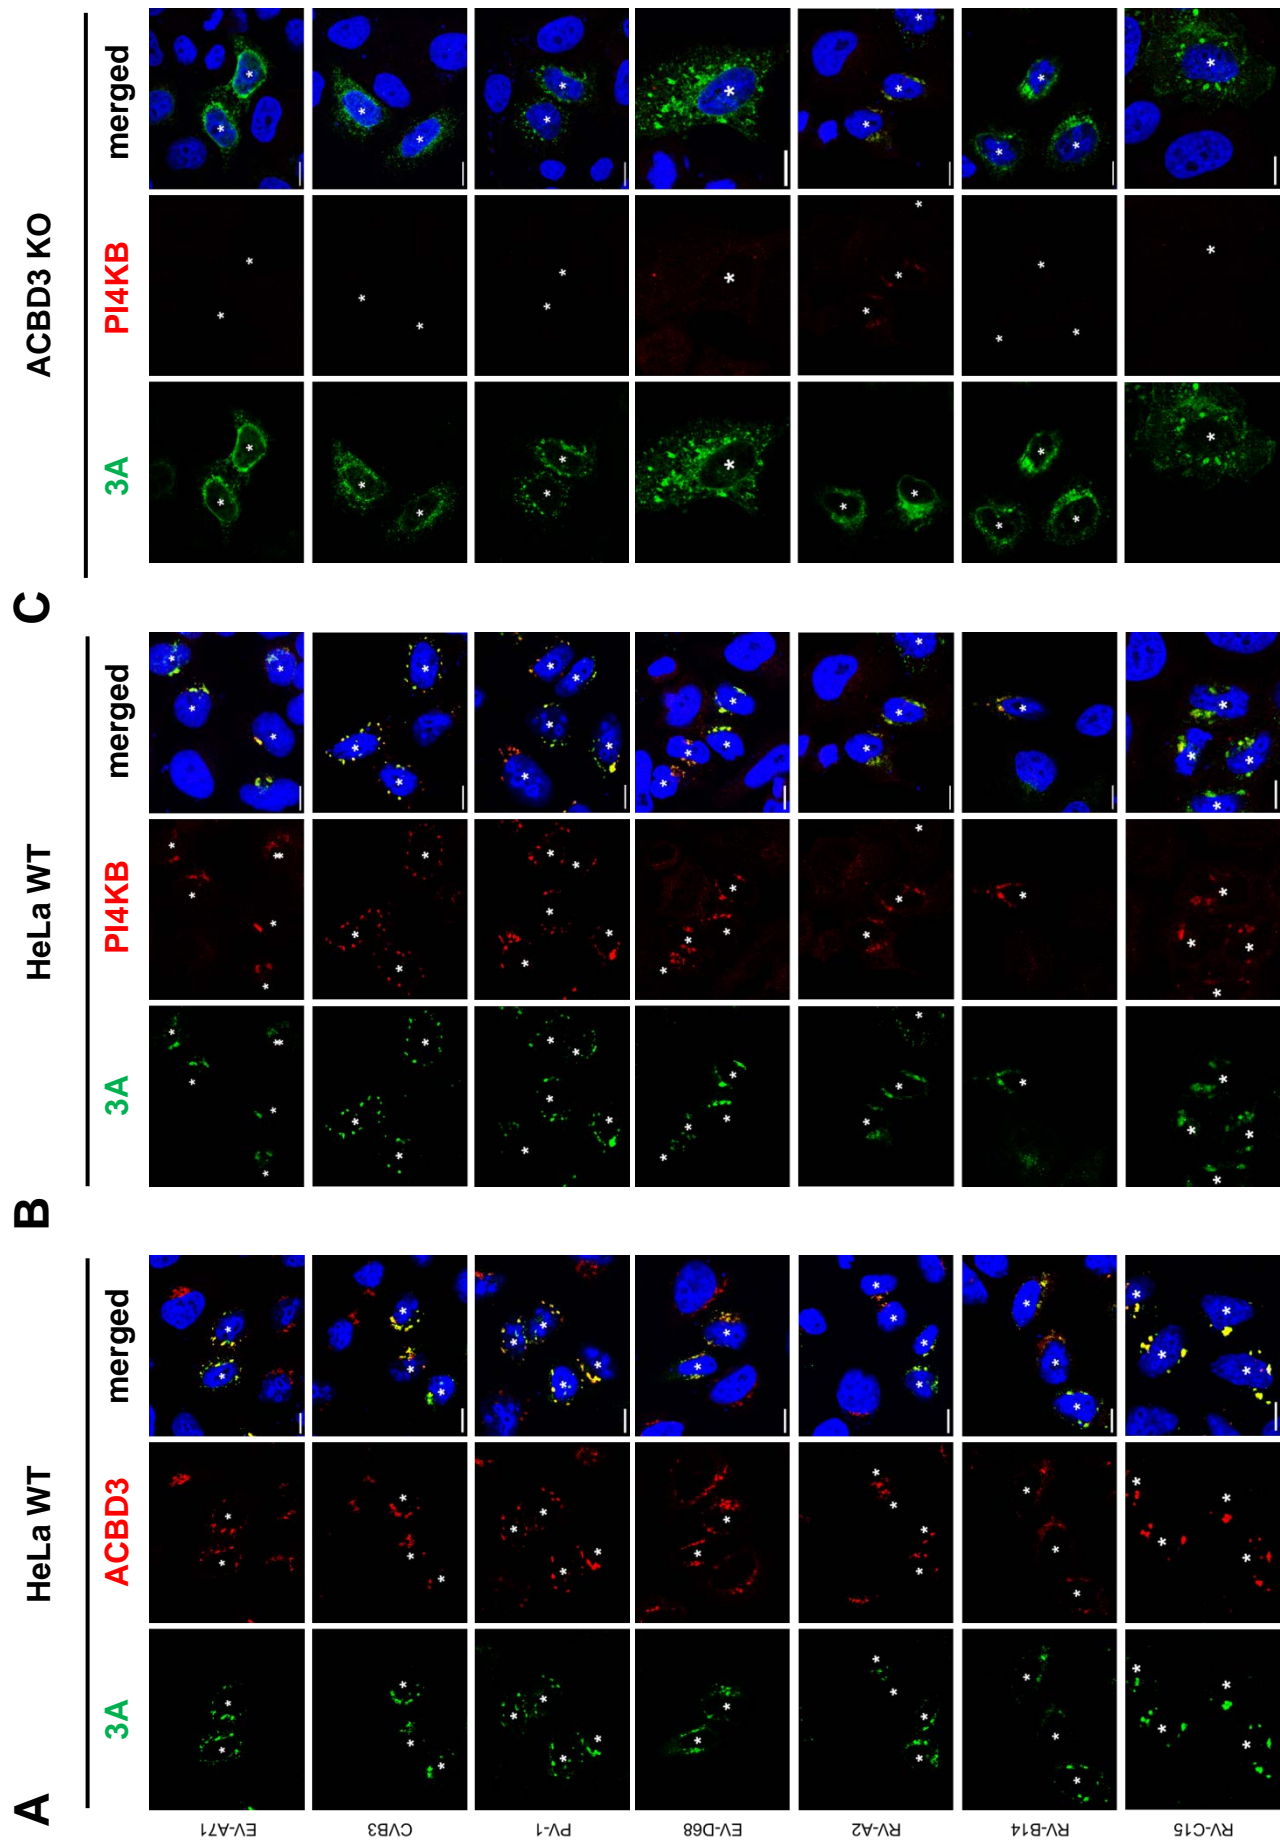

Figure 3. Effects of ACBD3 knockout on the localization of enterovirus 3A proteins and the recruitment of PI4KB.

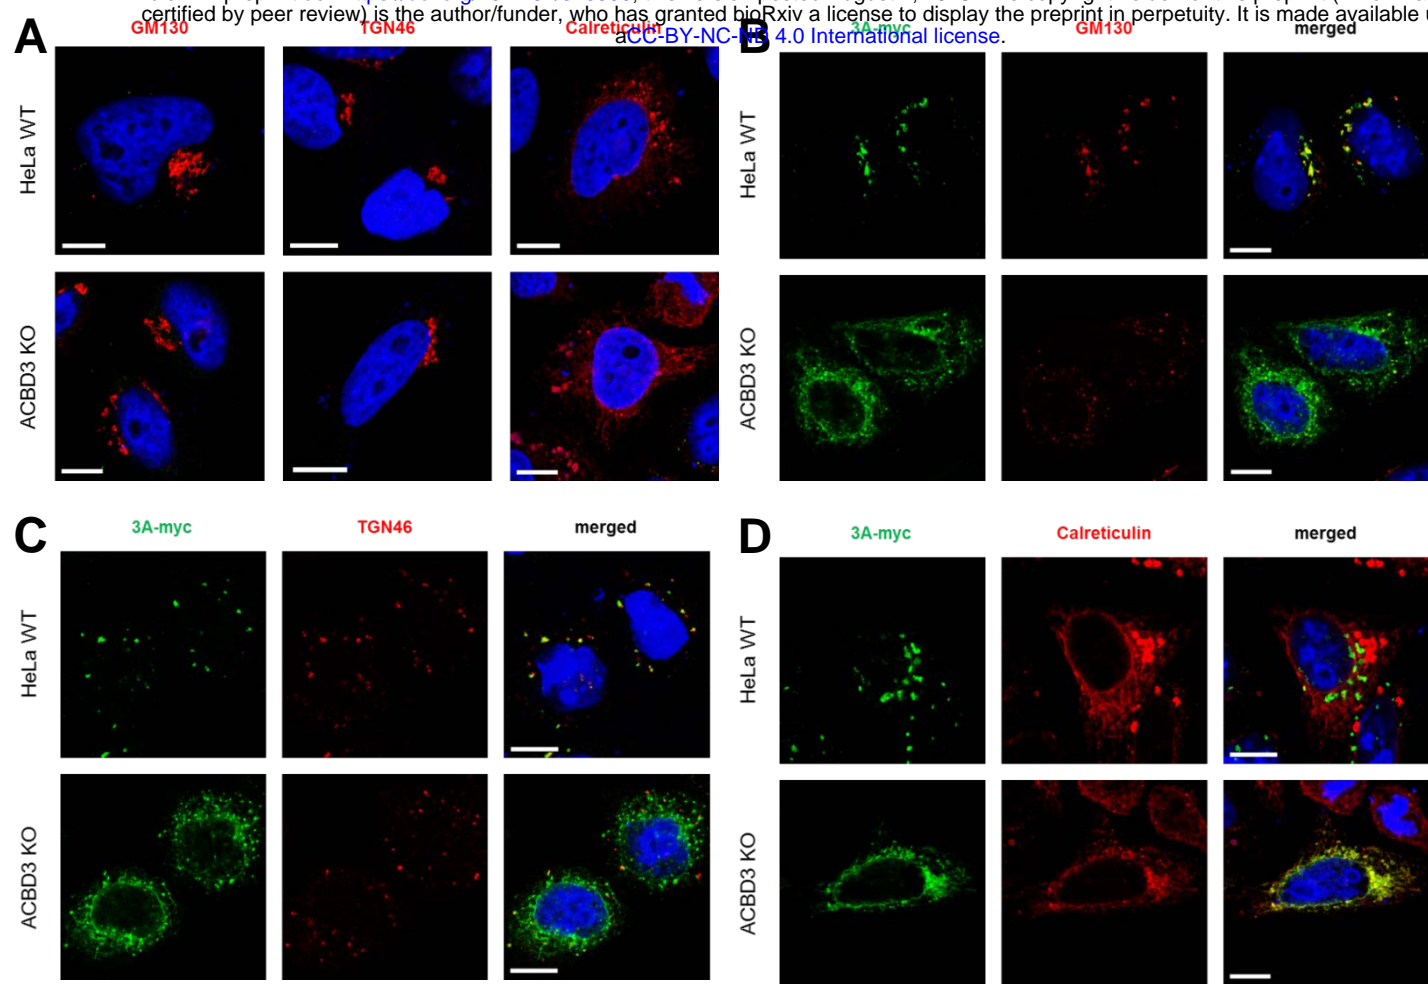

Figure 4. The localization of 3A differs between HeLa<sup>WT</sup> cells and ACBD3<sup>KO</sup> cells.

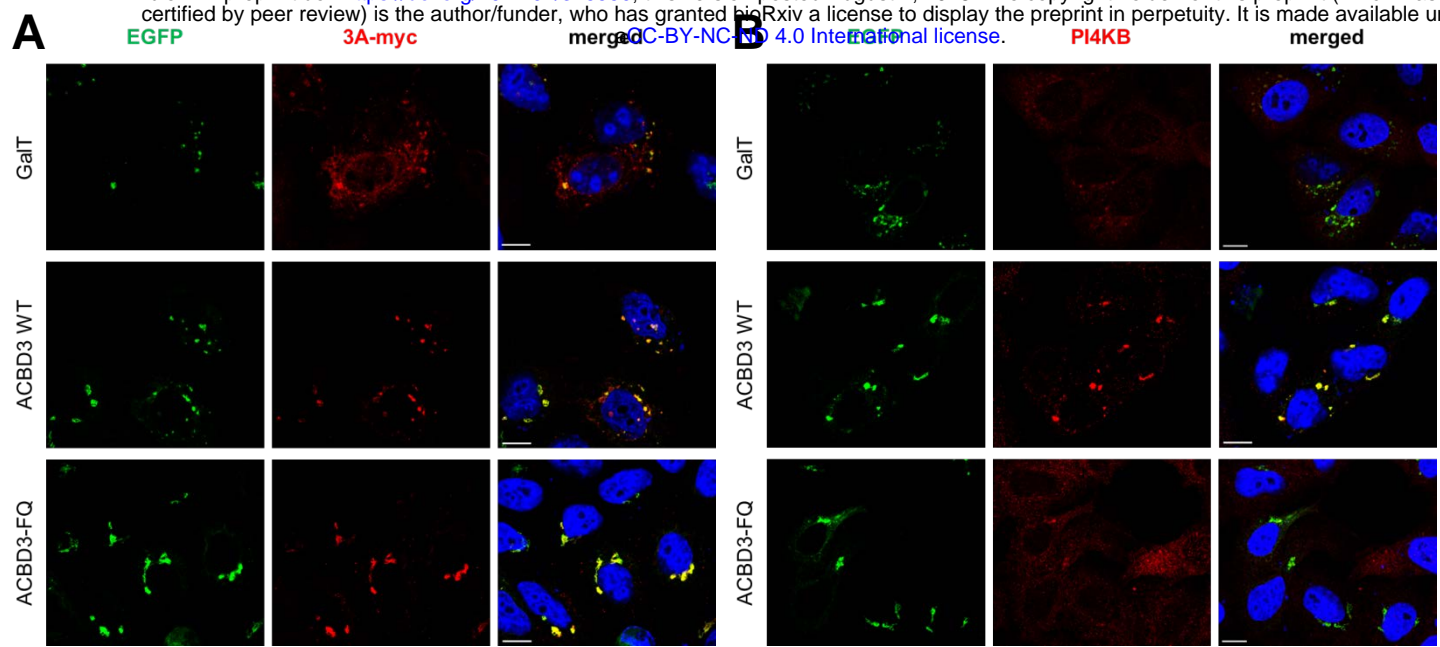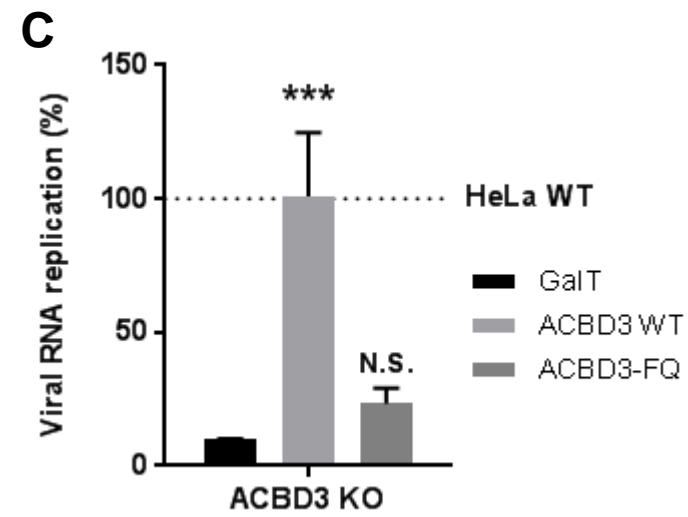

Figure 5. Reconstitution of wildtype ACBD3 but not ACBD3-FQ mutant rescues CVB3 replication and PI4KB recruitment.

**A**

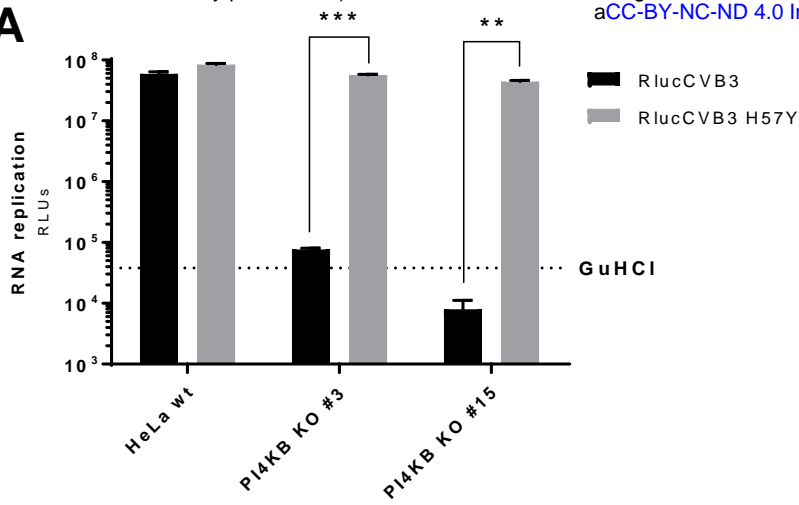

**B**

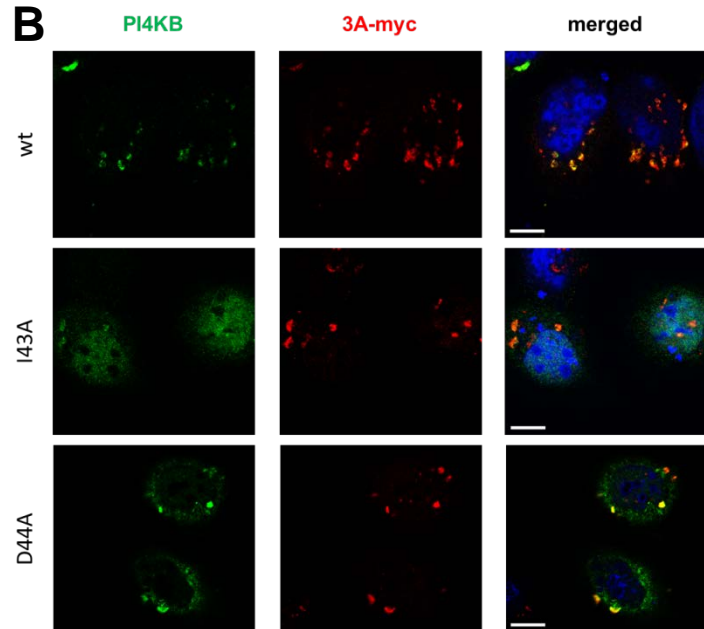

**C**

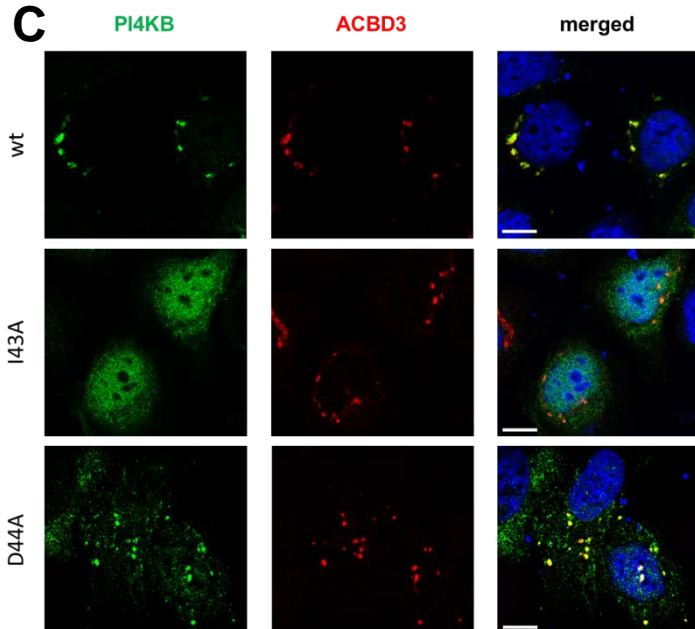

**D**

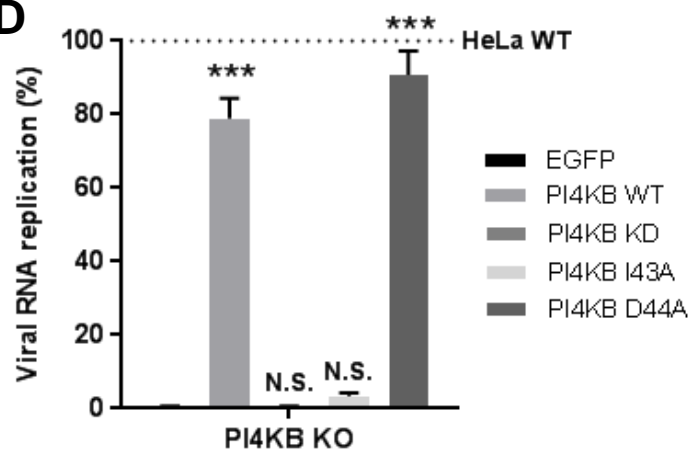

Figure 6. A PI4KB mutant, which does not interact with ACBD3, cannot be recruited by 3A and thereby cannot restoring virus replication in PI4KB<sup>KO</sup> cells.



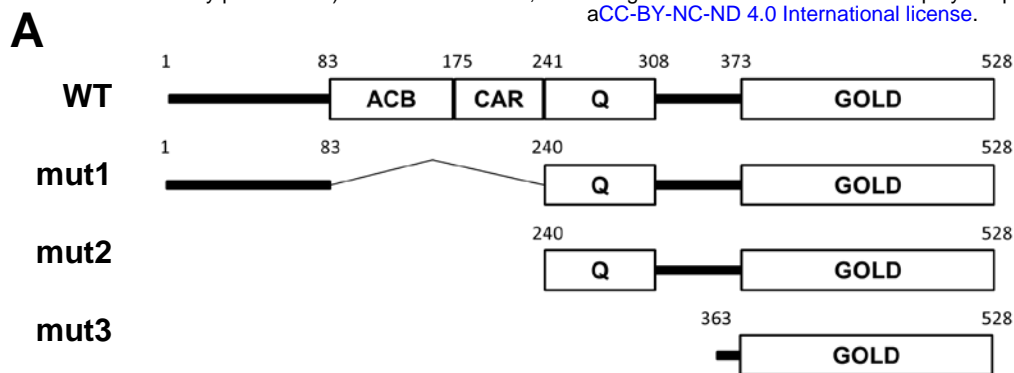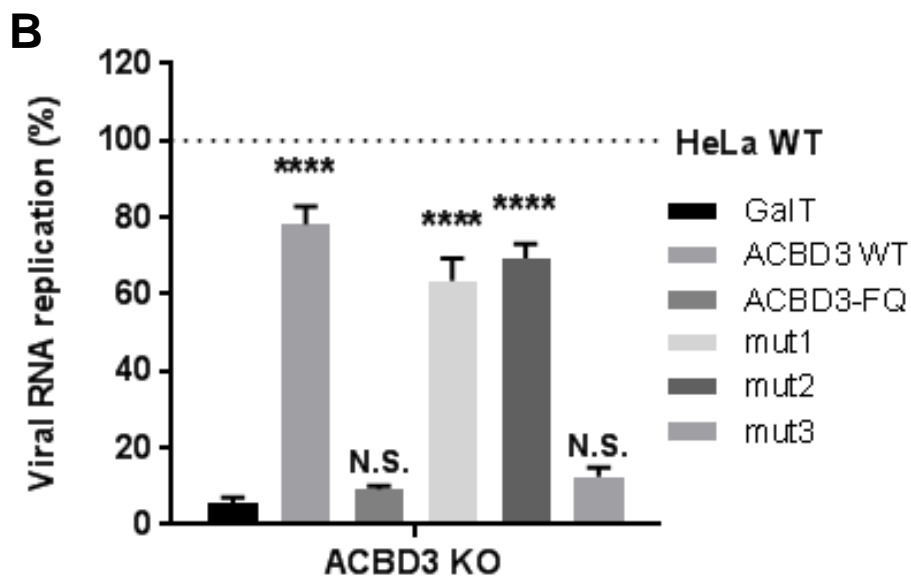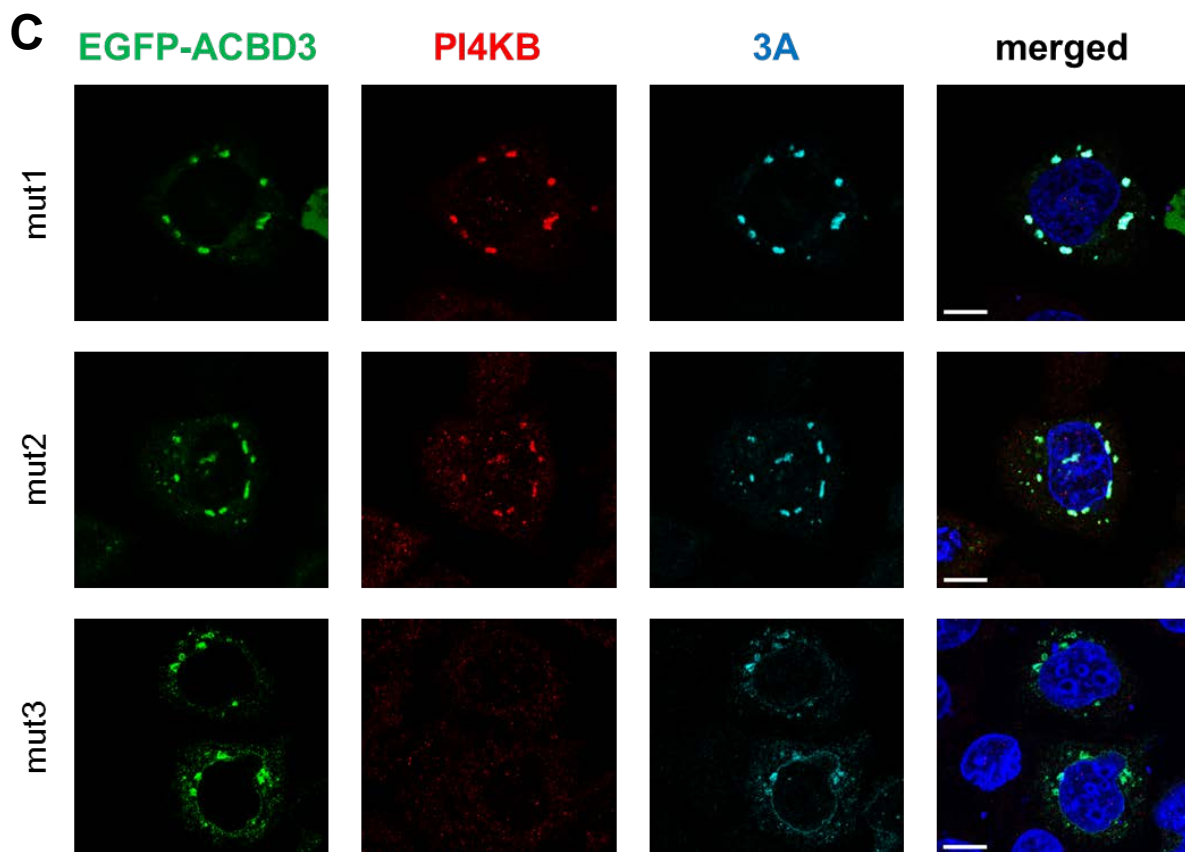

Figure 7. Q and GOLD domains of ACBD3 are sufficient to support 3A localization to the Golgi, PI4KB recruitment, and enterovirus replication.
